# Supplementary material for: In situ labeling of DNA reveals interindividual variation in nuclear DNA breakdown in hair and may be useful to predict success of forensic genotyping of hair
Source: Springer Nature journal article supplement (doi:10.1007/s00414-011-0566-5), 2011-04-07
Supplement: MOESM1 [file 8446294]

## Supplementary Material

### ***In situ* labeling of DNA reveals inter-individual variation in nuclear DNA breakdown in hair and may be useful to predict success of forensic genotyping of hair**

Sandra Szabo<sup>1</sup>, Karin Jaeger<sup>1</sup>, Heinz Fischer<sup>1</sup>, Erwin Tschachler<sup>1</sup>, Walther Parson<sup>2</sup>, Leopold Eckhart<sup>1</sup>

<sup>1</sup> Research Division of Biology and Pathobiology of the Skin, Department of Dermatology, Medical University of Vienna, Lazarettgasse 14, 1090 Vienna, Austria

<sup>2</sup> Institute of Legal Medicine, Innsbruck Medical University, Müllerstrasse 44, 6020 Innsbruck, Austria

Corresponding author:

Leopold Eckhart

Research Division of Biology and Pathobiology of the Skin

Department of Dermatology

Medical University of Vienna

Lazarettgasse 14

A-1090 Vienna

Austria

Phone: +43-1-40400-73735

Fax: +43-1-40400-73584

E-mail: [leopold.eckhart@meduniwien.ac.at](mailto:leopold.eckhart@meduniwien.ac.at)

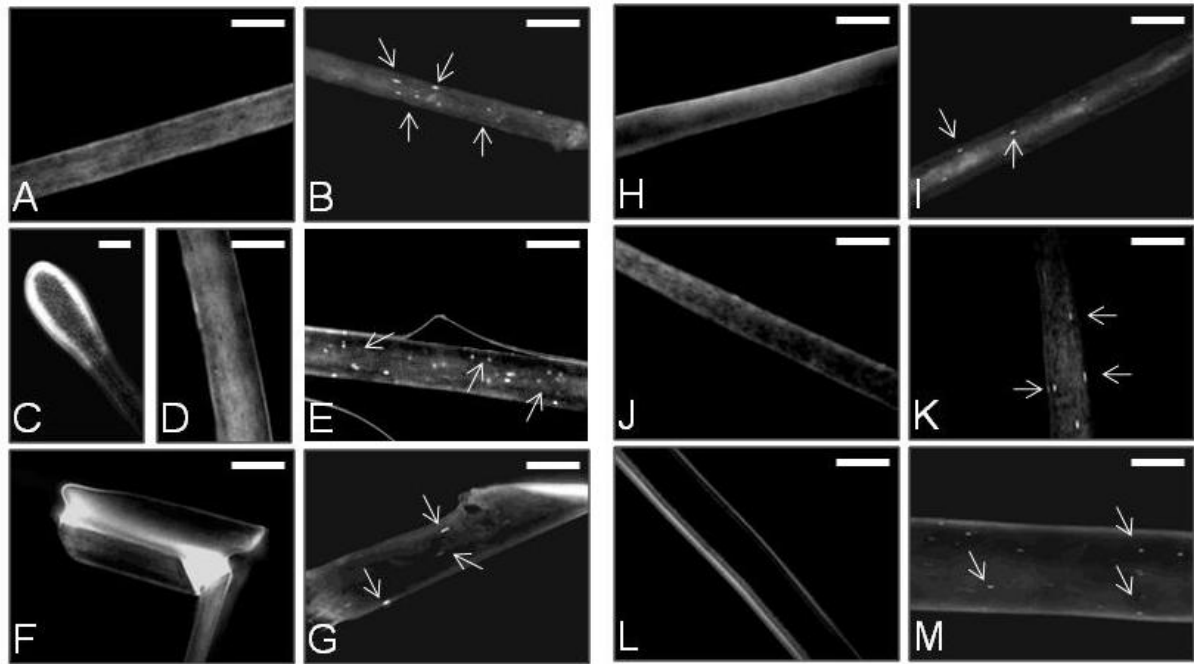

**Suppl. Fig. S1** *In situ* labeling of nuclear DNA in hair from various body regions. Five volunteers donated hairs from the arm (A, B) and axilla (C-E) as well as beard hairs (F,G), eyebrows (H, I), lashes (J, K) and pubic hairs (L, M). The hairs were *in situ*-labeled for DNA with Hoechst 33258, and nuclei were counted under the microscope. Examples of hairs lacking DNA-positive nuclei (A, D, F, H, J, L) and of hairs containing Hoechst-positive nuclei (B, E, G, I, K, M) are shown. Panel C shows the hair bulb in which nuclei of living cells are labeled intensely. Bars = 100  $\mu$ m

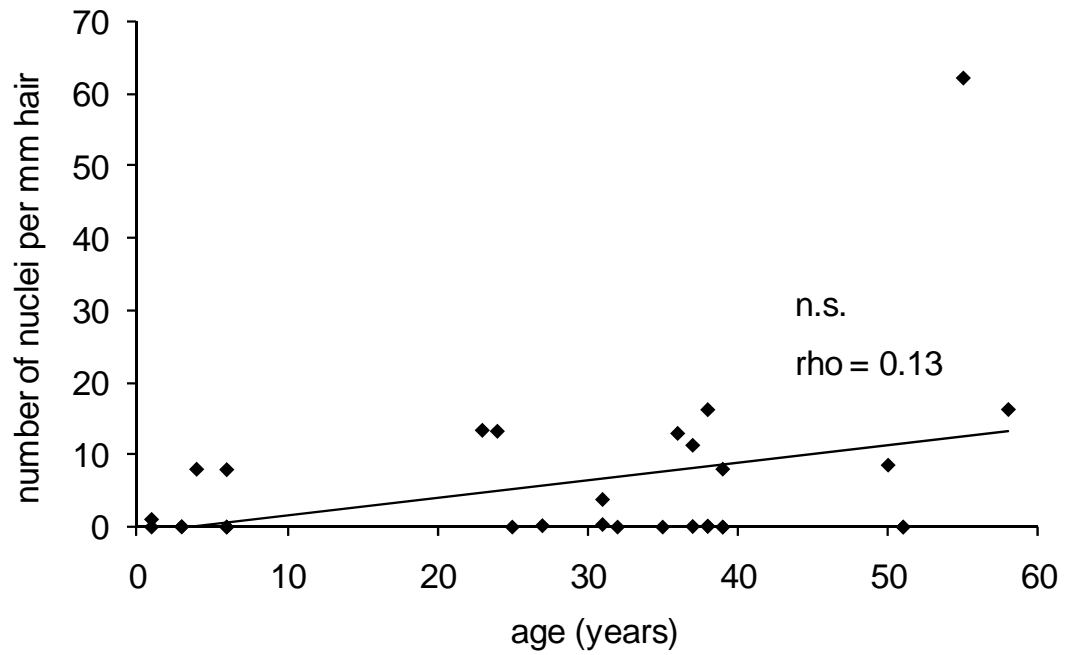

**Suppl. Fig. S2** Lack of correlation between the number of *in situ*-labeled nuclei and the age of the donor of hairs. Hair from individuals of different age was *in situ*-labeled for DNA with Hoechst 33258, and nuclei were counted under the microscope. The frequency of nuclear remnants was plotted over the age of the donors. rho, Spearman's rank correlation coefficient. n.s., not significant

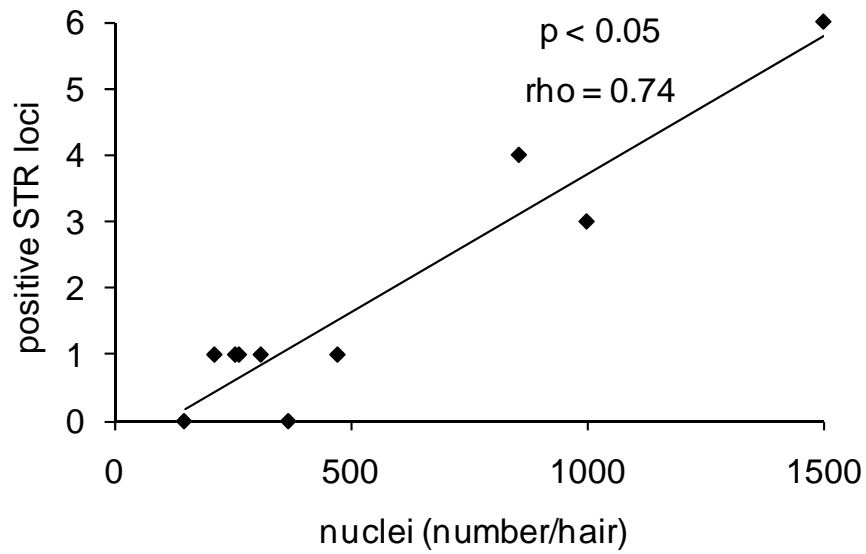

**Suppl. Fig. S3** Correlation between the number of *in situ*-labeled nuclei and the number of typeable STR loci in hairs. STR typing was performed on DNA extracted from 11 hairs that contained more than 8 nuclei per mm. Hairs in which no nuclei could be detected by *in situ* labeling of DNA (Fig. 4c, nuclei (number per hair) = 0) were excluded from the correlation analysis. rho, Spearman's rank correlation coefficient

## Supplementary Tables. Ct (cycle threshold) values used for DNA quantification

**Suppl. Table S1. Standard curve for nuclear DNA**

| nDNA concentration<br>(pg/ $\mu$ l) | Ct    |
|-------------------------------------|-------|
| $6.6 \times 10^3$                   | 9.57  |
| $6.6 \times 10^2$                   | 13.03 |
| $6.6 \times 10^1$                   | 16.62 |
| 6.6                                 | 20.39 |
| $6.6 \times 10^{-1}$                | 23.36 |
| $6.6 \times 10^{-2}$                | 26.12 |
| $6.6 \times 10^{-3}$                | 29.02 |

Standard curve: concentration (nDNA) =  $7.530 \times e^{-Ct/1.415}$  (pg/ $\mu$ l)

**Suppl. Table S2. Standard curve for mitochondrial DNA**

| mtDNA copy number<br>(copies / $\mu$ l)* | mtDNA concentration<br>(pg/ $\mu$ l)** | Ct    |
|------------------------------------------|----------------------------------------|-------|
| $2 \times 10^9$                          | $3.6 \times 10^4$                      | 8.85  |
| $2 \times 10^8$                          | $3.6 \times 10^3$                      | 12.43 |
| $2 \times 10^7$                          | $3.6 \times 10^2$                      | 15.66 |
| $2 \times 10^6$                          | $3.6 \times 10^1$                      | 18.63 |
| $2 \times 10^5$                          | 3.6                                    | 22.54 |
| $2 \times 10^4$                          | $3.6 \times 10^{-1}$                   | 25.80 |
| $2 \times 10^2$                          | $3.6 \times 10^{-3}$                   | 31.93 |

\* As described in the Materials and Methods section, a fragment of the mitochondrial genome was cloned into the pCR2.1-Topo plasmid. A dilution series of this cloned mtDNA fragment was used to generate the standard curve.

\*\* Concentration of mitochondrial DNA corresponding to the number of copies (1 copy of mtDNA corresponding to  $1.8 \times 10^{-5}$  pg).

Standard curve: concentration (mtDNA) =  $1.877 \times e^{-Ct/1.438}$  (pg/ $\mu$ l)

**Suppl. Table S3. Comparison of nuclear DNA contents of white and pigmented hair**

| Donor | white hair |                             |                              | pigmented hair |                             |                              |
|-------|------------|-----------------------------|------------------------------|----------------|-----------------------------|------------------------------|
|       | Ct         | nDNA conc.<br>(pg/ $\mu$ l) | nDNA content/hair<br>(ng/mg) | Ct             | nDNA conc.<br>(pg/ $\mu$ l) | nDNA content/hair<br>(ng/mg) |
| 1     | 20.71      | 3.33                        | 0.13                         | 20.79          | 3.15                        | 0.13                         |
| 2     | 16.93      | 48.09                       | 1.92                         | 17.5           | 32.15                       | 1.29                         |
| 3     | 17.64      | 29.12                       | 1.16                         | 18.6           | 14.78                       | 0.59                         |
| 4     | 22.21      | 1.15                        | 0.05                         | 21.61          | 1.76                        | 0.07                         |
| 5     | 17.55      | 31.03                       | 1.24                         | 17.29          | 37.29                       | 1.49                         |
| 6     | 17.66      | 28.71                       | 1.15                         | 18.18          | 19.89                       | 0.80                         |
| 7     | 21.42      | 2.02                        | 0.08                         | 22.54          | 0.91                        | 0.04                         |
| 8     | 21.74      | 1.61                        | 0.06                         | 22.57          | 0.89                        | 0.04                         |

DNA was extracted from 5 mg white and pigmented hair of each donor, purified as described in the Materials and Methods section and finally eluted in 200  $\mu$ l buffer. The concentration (conc.) of nDNA in this solution was determined by qPCR. The nDNA contents of hair correspond to the values shown in Figure 2b.

**Suppl. Table S4. Nuclear DNA content of hair (batch of 5 mg)**

| Sample | Ct    | nDNA conc.<br>(pg/ $\mu$ l) | nDNA content/hair<br>(ng/mg) |
|--------|-------|-----------------------------|------------------------------|
| 1      | 20.88 | 2.95                        | 0.12                         |
| 2      | 21.75 | 1.60                        | 0.06                         |
| 3      | 21.16 | 2.42                        | 0.10                         |
| 4      | 22.52 | 0.93                        | 0.04                         |
| 5      | 19.55 | 7.55                        | 0.30                         |
| 6      | 22.75 | 0.79                        | 0.03                         |
| 7      | 16.66 | 58.20                       | 2.33                         |
| 8      | 18.46 | 16.32                       | 0.65                         |
| 9      | 21.47 | 1.95                        | 0.08                         |
| 10     | 22.52 | 0.93                        | 0.04                         |
| 11     | 17.75 | 26.94                       | 1.08                         |
| 12     | 22.49 | 0.95                        | 0.04                         |
| 13     | 17.42 | 34.02                       | 1.36                         |
| 14     | 17.82 | 25.64                       | 1.03                         |
| 15     | 20.16 | 4.91                        | 0.20                         |
| 16     | 20.75 | 3.24                        | 0.13                         |
| 17     | 20.73 | 3.28                        | 0.13                         |
| 18     | 21.97 | 1.37                        | 0.05                         |
| 19     | 19.87 | 6.03                        | 0.24                         |
| 20     | 18.85 | 12.39                       | 0.50                         |
| 21     | 22.52 | 0.93                        | 0.04                         |
| 22     | 16.92 | 48.43                       | 1.94                         |
| 23     | 22.02 | 1.32                        | 0.05                         |
| 24     | 19.86 | 6.07                        | 0.24                         |
| 25     | 21.05 | 2.62                        | 0.10                         |
| 26     | 21.54 | 1.85                        | 0.07                         |
| 27     | 18.81 | 12.74                       | 0.51                         |
| 28     | 21.10 | 2.53                        | 0.10                         |
| 29     | 19.85 | 6.11                        | 0.24                         |
| 30     | 19.18 | 9.81                        | 0.39                         |

DNA was extracted from 5 mg hair of each donor, purified as described in the Materials and Methods section and finally eluted in 200  $\mu$ l buffer. The nDNA contents of hair correspond to the values shown in Figures 3a and 3c.

**Suppl. Table S5. Mitochondrial DNA content of hair (batch of 5 mg)**

| Sample | Ct    | mtDNA conc.<br>(pg/ $\mu$ l) | mtDNA content/hair<br>(pg/mg) |
|--------|-------|------------------------------|-------------------------------|
| 1      | 25.46 | 0.38                         | 15                            |
| 2      | 25.98 | 0.27                         | 11                            |
| 3      | 20.90 | 9.16                         | 367                           |
| 4      | 32.03 | 0.00                         | 0                             |
| 5      | 21.93 | 4.48                         | 179                           |
| 6      | 30.37 | 0.01                         | 1                             |
| 7      | 26.86 | 0.15                         | 6                             |
| 8      | 24.23 | 0.90                         | 36                            |
| 9      | 22.77 | 2.49                         | 100                           |
| 10     | 24.25 | 0.89                         | 36                            |
| 11     | 25.91 | 0.28                         | 11                            |
| 12     | 26.71 | 0.16                         | 6                             |
| 13     | 21.51 | 5.99                         | 240                           |
| 14     | 23.97 | 1.08                         | 43                            |
| 15     | 24.75 | 0.63                         | 25                            |
| 16     | 23.72 | 1.29                         | 52                            |
| 17     | 23.11 | 1.97                         | 79                            |
| 18     | 23.13 | 1.94                         | 78                            |
| 19     | 24.15 | 0.96                         | 38                            |
| 20     | 25.19 | 0.46                         | 19                            |
| 21     | 26.02 | 0.26                         | 10                            |
| 22     | 24.34 | 0.84                         | 33                            |
| 23     | 24.04 | 1.03                         | 41                            |
| 24     | 24.54 | 0.73                         | 29                            |
| 25     | 25.14 | 0.48                         | 19                            |
| 26     | 25.35 | 0.41                         | 17                            |
| 27     | 24.18 | 0.94                         | 37                            |
| 28     | 23.67 | 1.33                         | 53                            |
| 29     | 24.28 | 0.87                         | 35                            |
| 30     | 28.55 | 0.04                         | 2                             |

DNA was extracted from 5 mg hair of each donor, purified as described in the Materials and Methods section and finally eluted in 200  $\mu$ l buffer. The mtDNA contents of hair correspond to the values shown in Figures 3b and 3c.



**Suppl. Table S6. Nuclear DNA content of single hairs (length 2 cm)**

| Sample | Ct    | nDNA conc.<br>(pg/ $\mu$ l) | nDNA content/single hair<br>(pg) |
|--------|-------|-----------------------------|----------------------------------|
| 1      | 27.27 | 0.03                        | 6.5                              |
| 2      | 26.31 | 0.06                        | 12.7                             |
| 3      | 26.71 | 0.05                        | 9.6                              |
| 4      | 27.01 | 0.04                        | 7.8                              |
| 5      | 24.90 | 0.17                        | 34.5                             |
| 6      | 27.20 | 0.03                        | 6.8                              |
| 7      | 26.83 | 0.04                        | 8.8                              |
| 8      | 23.75 | 0.39                        | 77.7                             |
| 9      | 24.53 | 0.22                        | 44.8                             |
| 10     | 25.56 | 0.11                        | 21.6                             |
| 11     | 27.48 | 0.03                        | 5.6                              |
| 12     | 27.03 | 0.04                        | 7.7                              |
| 13     | 24.10 | 0.30                        | 60.7                             |
| 14     | 23.45 | 0.48                        | 96.1                             |
| 15     | 26.11 | 0.07                        | 14.7                             |
| 16     | 26.58 | 0.05                        | 10.5                             |
| 17     | 24.81 | 0.18                        | 36.7                             |
| 18     | 23.99 | 0.33                        | 65.6                             |
| 19     | 23.31 | 0.53                        | 106.0                            |
| 20     | 23.32 | 0.53                        | 105.3                            |
| 21     | 26.20 | 0.07                        | 13.8                             |
| 22     | 27.04 | 0.04                        | 7.6                              |
| 23     | 26.64 | 0.05                        | 10.1                             |
| 24     | 26.66 | 0.05                        | 9.9                              |
| 25     | 27.09 | 0.04                        | 7.3                              |
| 26     | 24.58 | 0.22                        | 43.2                             |
| 27     | 25.30 | 0.13                        | 26.0                             |
| 28     | 23.50 | 0.46                        | 92.7                             |
| 29     | 26.46 | 0.06                        | 11.5                             |
| 30     | 26.82 | 0.04                        | 8.9                              |
| 31     | 26.90 | 0.04                        | 8.4                              |
| 32     | 25.81 | 0.09                        | 18.1                             |
| 33     | 28.03 | 0.02                        | 3.8                              |
| 34     | 25.87 | 0.09                        | 17.4                             |
| 35     | 27.27 | 0.03                        | 6.5                              |
| 36     | 26.82 | 0.04                        | 8.9                              |
| 37     | 25.56 | 0.11                        | 21.6                             |
| 38     | 25.97 | 0.08                        | 16.2                             |
| 39     | 27.22 | 0.03                        | 6.7                              |
| 40     | 27.18 | 0.03                        | 6.9                              |

DNA was extracted from hair samples of 2 cm length, purified as described in the Materials and Methods section and finally eluted in 200  $\mu$ l buffer. The nDNA contents of hairs correspond to the values shown in Figure 4a.

**Suppl. Table S7. Mitochondrial DNA content of single hairs (length 2 cm)**

| Sample | Ct    | mtDNA conc.<br>(pg/ $\mu$ l) | mtDNA content/single hair<br>(pg) |
|--------|-------|------------------------------|-----------------------------------|
| 1      | 29.25 | 0.028                        | 5.5                               |
| 2      | 28.02 | 0.065                        | 12.9                              |
| 3      | 28.86 | 0.036                        | 7.2                               |
| 4      | 32.75 | 0.002                        | 0.5                               |
| 5      | 27.85 | 0.073                        | 14.6                              |
| 6      | 28.94 | 0.034                        | 6.8                               |
| 7      | 32.56 | 0.003                        | 0.5                               |
| 8      | 31.97 | 0.004                        | 0.8                               |
| 9      | 29.10 | 0.031                        | 6.1                               |
| 10     | 28.63 | 0.042                        | 8.5                               |
| 11     | 27.04 | 0.128                        | 25.6                              |
| 12     | 28.91 | 0.035                        | 7.0                               |
| 13     | 29.48 | 0.023                        | 4.7                               |
| 14     | 29.52 | 0.023                        | 4.6                               |
| 15     | 32.02 | 0.004                        | 0.8                               |
| 16     | 34.18 | 0.001                        | 0.2                               |
| 17     | 27.27 | 0.109                        | 21.8                              |
| 18     | 29.28 | 0.027                        | 5.4                               |
| 19     | 26.69 | 0.163                        | 32.6                              |
| 20     | 29.87 | 0.018                        | 3.6                               |
| 21     | 29.57 | 0.022                        | 4.4                               |
| 22     | 31.30 | 0.007                        | 1.3                               |
| 23     | 27.62 | 0.085                        | 17.1                              |
| 24     | 30.57 | 0.011                        | 2.2                               |
| 25     | 29.22 | 0.028                        | 5.6                               |
| 26     | 31.15 | 0.007                        | 1.5                               |
| 27     | 29.36 | 0.025                        | 5.1                               |
| 28     | 29.67 | 0.021                        | 4.1                               |
| 29     | 30.77 | 0.010                        | 1.9                               |
| 30     | 29.47 | 0.024                        | 4.7                               |
| 31     | 30.91 | 0.009                        | 1.7                               |
| 32     | 28.47 | 0.047                        | 9.5                               |
| 33     | 29.12 | 0.030                        | 6.0                               |
| 34     | 29.90 | 0.017                        | 3.5                               |
| 35     | 31.98 | 0.004                        | 0.8                               |
| 36     | 29.17 | 0.029                        | 5.8                               |
| 37     | 30.78 | 0.009                        | 1.9                               |
| 38     | 31.00 | 0.008                        | 1.6                               |
| 39     | 31.63 | 0.005                        | 1.1                               |
| 40     | 29.51 | 0.023                        | 4.6                               |

DNA was extracted from hair samples of 2 cm length, purified as described in the Materials and Methods section and finally eluted in 200  $\mu$ l buffer. The mtDNA contents of hairs correspond to the values shown in Figure 4b.
